# Supplementary material
Source: PubMed Central journal article supplement (PMC2824466)
Supplement: emboj2009344s1.pdf [file emboj2009344s1.pdf]

## Supplemental Figure 1

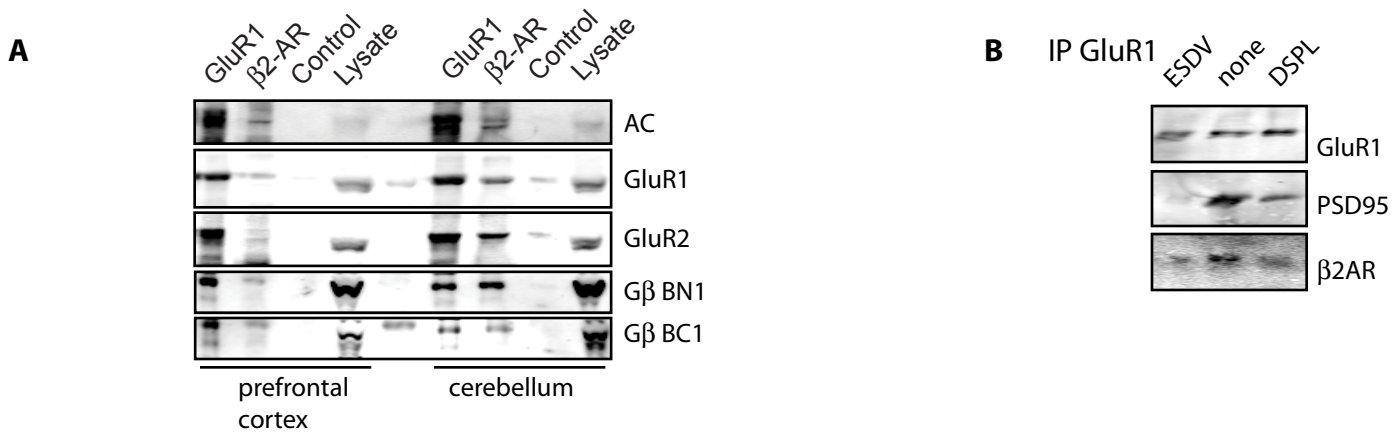

Supplemental Figure 1. GluR1 forms a complex with the  $\beta$ 2AR, Gs, and adenylyl cyclase in PFC and cerebellum via PDZ interactions. A. Rat PFC and cerebella were extracted with 1 % Triton X-100 before ultracentrifugation, immunoprecipitation with antibodies against GluR1 (lane 1),  $\beta$ 2AR (H-20; lane 2), or a nonspecific control IgG (lane 3), followed by immunoblotting for the proteins indicated on the right side. Anti-GluR1 and anti- $\beta$ 2AR specifically precipitated from both sources adenylyl cyclase (AC), GluR1, GluR2, and  $G\alpha$ .  $G\alpha$  was observed with two different antibodies that labeled the N- (BN1) and C-termini (BC1) of  $G\alpha_{1\alpha 4}$ . Extract aliquots containing 500  $\mu$ g total protein were used for immunoprecipitations and aliquots containing 25  $\mu$ g protein were loaded directly as positive control for immunoblotting. Similar results were obtained in 2 other experiments. B. Rat forebrain was extracted with 1 % Triton X-100 before ultracentrifugation, incubation with the indicated peptides (10  $\mu$ M) for 1 hr, immunoprecipitation with antibodies against GluR1, and immunoblotting for the proteins indicated on the right side n = 3 for all experiments.
