# Supplementary material
Source: PubMed Central journal article supplement (PMC2824466)
Supplement: emboj2009344s3.pdf [file emboj2009344s3.pdf]

Supplementary Figure 3

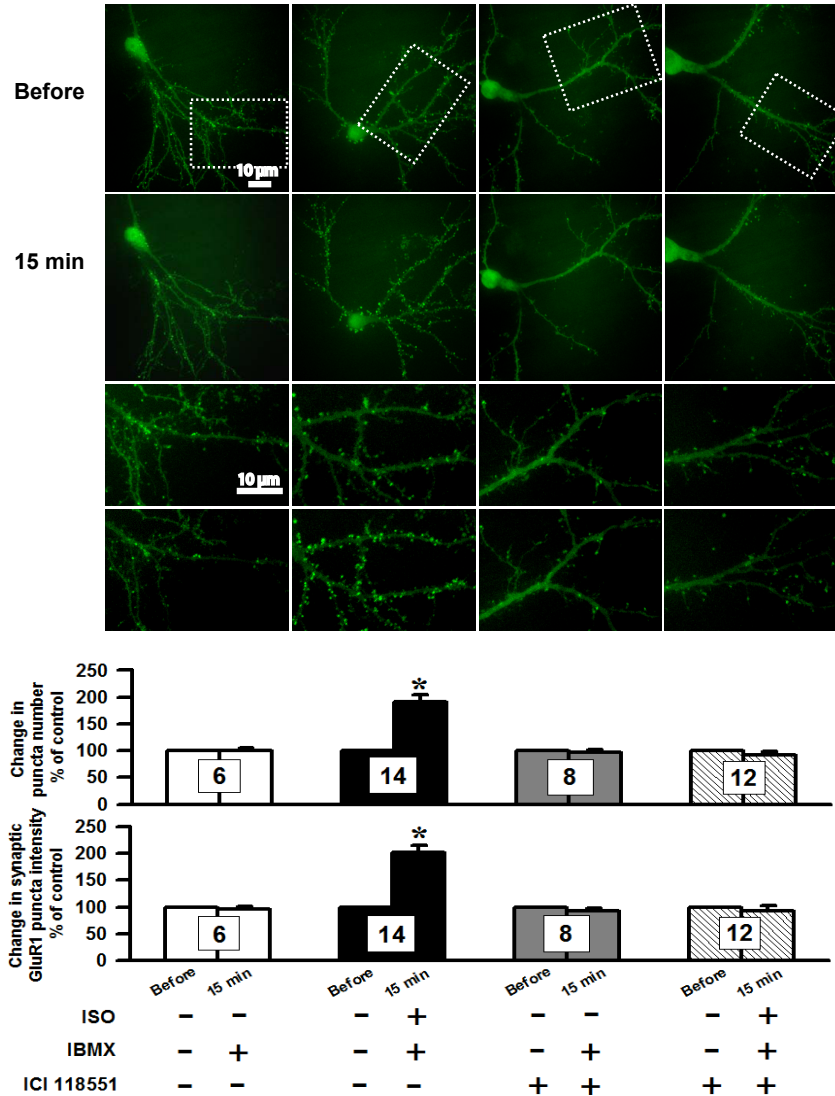

Supplemental Figure 3. ISO-induced increases in SEP-GluR1 surface expression in dendritic spines is mediated by the  $\beta$ 2AR. Primary hippocampal cultures were transfected with SEP-GluR1 at 5-7 DIV and monitored at 21DIV. Treatments with ISO (1  $\mu$ M) plus IBMX (250  $\mu$ M) for 15 min (column 2; compare top (“before”) and bottom panels (“15 min”) for low magnification; fields selected for higher magnifications underneath respective panels are outlined) increased frequency and signal intensity of SEP-GluR1 puncta, which was blocked by application of the  $\beta$ 2AR-selective antagonist ICI118551 (1  $\mu$ M) immediately before monitoring of SEP-GluR1 signals started (column 4). IBMX by itself or in combination with ICI118551 had no effect (column 1 and 3, respectively). \* $p < 0.05$  compared to controls treatments; Error bars: SEM. The number of neurons from 3 independent experiments is given inside bars.
