# Supplementary material
Source: PubMed Central journal article supplement (PMC2824466)
Supplement: emboj2009344s5.pdf [file emboj2009344s5.pdf]

Supplemental Figure 5

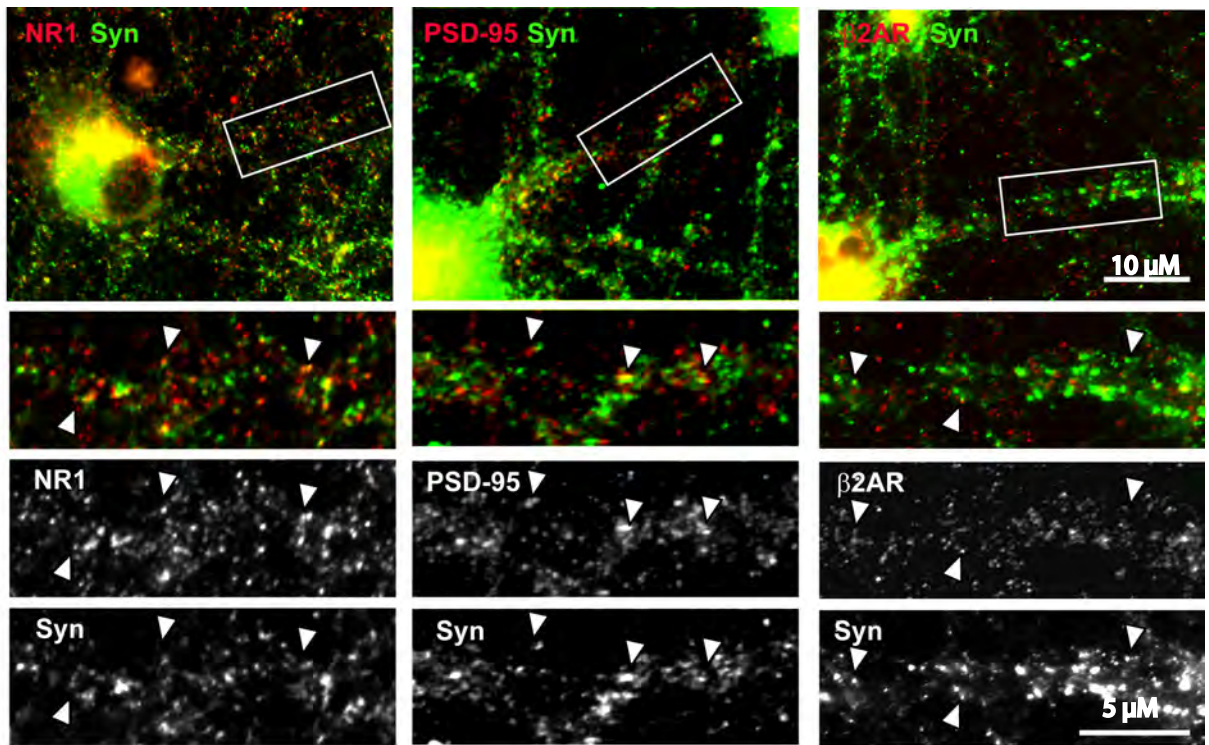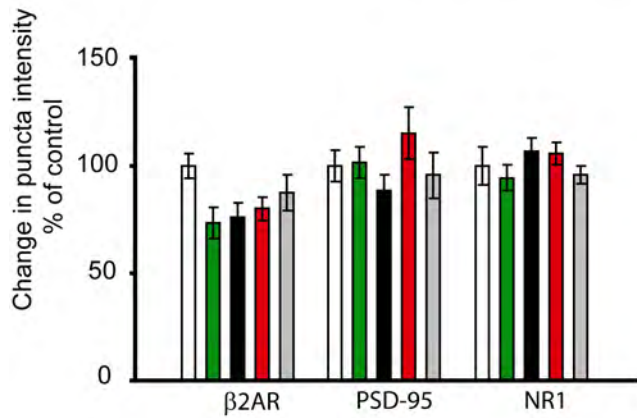

*n* = 13 to 18 cells per group

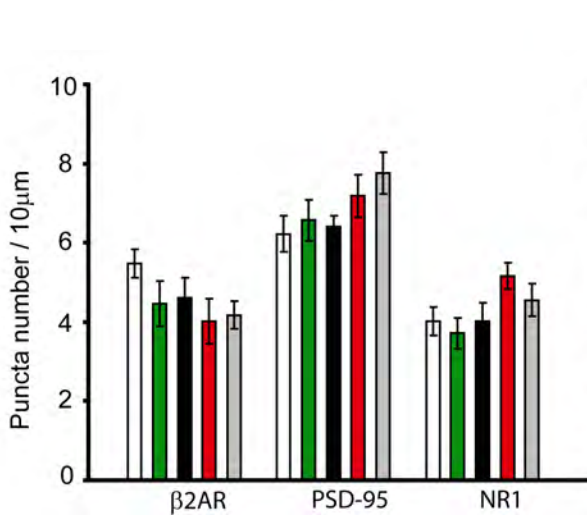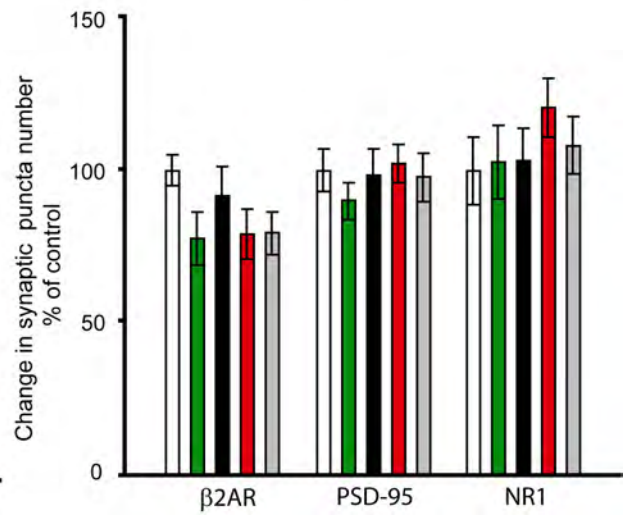

Supplemental Figure 5. Peptides do not affect distribution of NMDAR, PSD-95 and  $\beta$ 2AR under basal conditions. Primary hippocampal cultures (18 DIV) were left untreated or treated with the membrane-permeable peptides 11R-QGRNSNTNDSPL (**DSPL**) and 11R-VYKKMPSIE**SDV** (**ESDV**) versus their inactive analogues 11R-QGRNSNTN**DAPA** (**DAPA**) and 11R-VYKKMPSIE**ADA** (**EADA**; 1  $\mu$ M each) for 2 h before fixation, permeabilization, and double-labeled with anti-synaptophysin antibody (green) plus either anti-NR1, anti-PSD-95, or H2O against the  $\beta$ 2AR. Changes in puncta intensity, number per 10  $\mu$ m, and synaptic puncta number are quantified below (averages+SEM for 13-18 neurons per condition from 3 independent experiments).
