# Supplementary material
Source: PubMed Central journal article supplement (PMC2824466)
Supplement: emboj2009344s6.pdf [file emboj2009344s6.pdf]

# Supplemental Figure 6

**A**

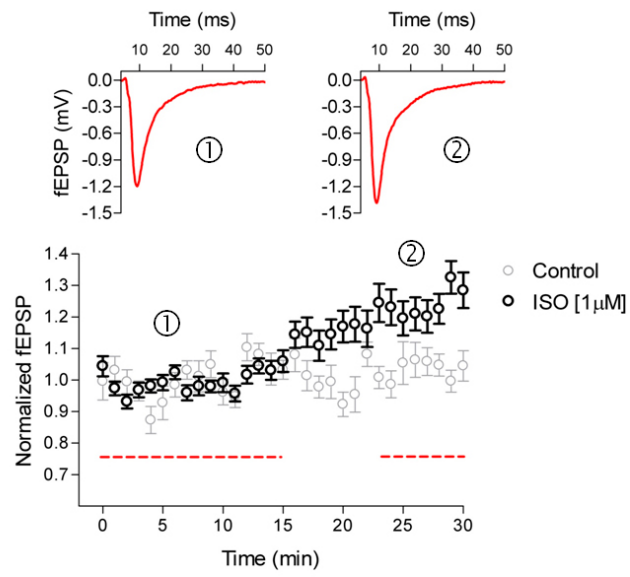

**B**

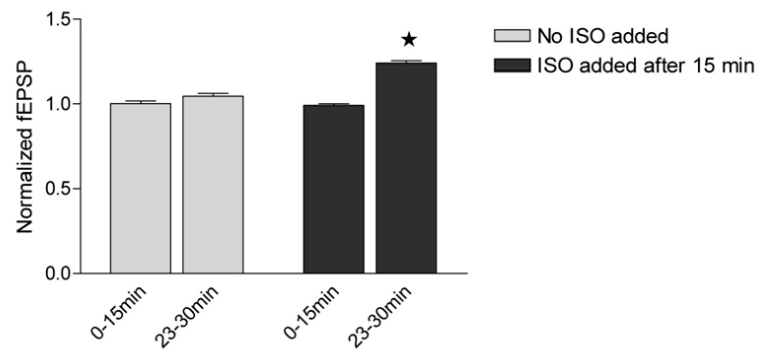

**C**

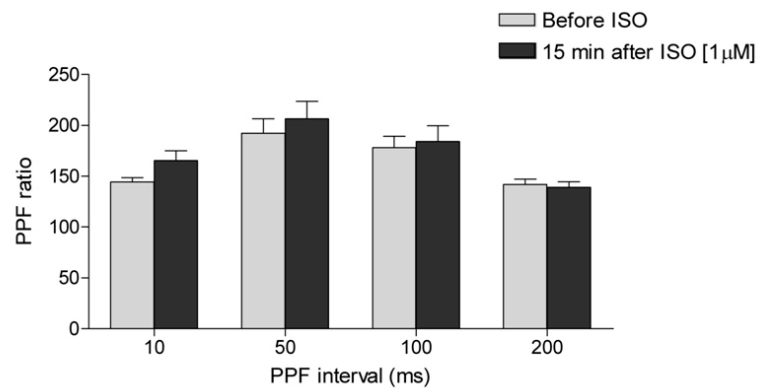

Supplemental Figure 6. Effect of ISO on fEPSPs in hippocampal slices.

**A.** Initial slope of fEPSPs in acute hippocampal slices normalized to average of first 15 min. Perfusion was switched to buffer with ISO (10  $\mu$ M) at 15 min (dark symbols; n=23; 14 recordings showed an increase, 7 no change, and 2 a decrease). No change was seen when ISO was absent after change in perfusion buffer (n=6 slices). Insert: example fEPSP traces before and 15 min after addition of ISO (averages of 10 recordings).

**B.** Changes in fEPSP upon addition of ISO (10  $\mu$ M). Values were normalized to averages of first 15 min (before buffer change). Control vs. ISO experiments were  $1.002 \pm 0.015$  vs.  $0.992 \pm 0.009$  for 0-15 min and  $1.045 \pm 0.018$  vs.  $1.240 \pm 0.016$  for 23-30 min (8-15 min after buffer change; n=6 vs. n=23; \*p<0.0001).

**C.** Paired-pulse facilitation ratios were determined immediately before and 15 min after the onset of ISO perfusion for the indicated test intervals.

ISO induced an increase in fEPSP strength in the majority but not all hippocampal slices. The average increase for all slices was about 24%. There was no change in paired-pulse facilitation hinting to a postsynaptic effect of ISO (n=7).
