# Supplementary material
Source: PubMed Central journal article supplement (PMC2824466)
Supplement: emboj2009344s7.pdf [file emboj2009344s7.pdf]

### Supplemental Figure 7

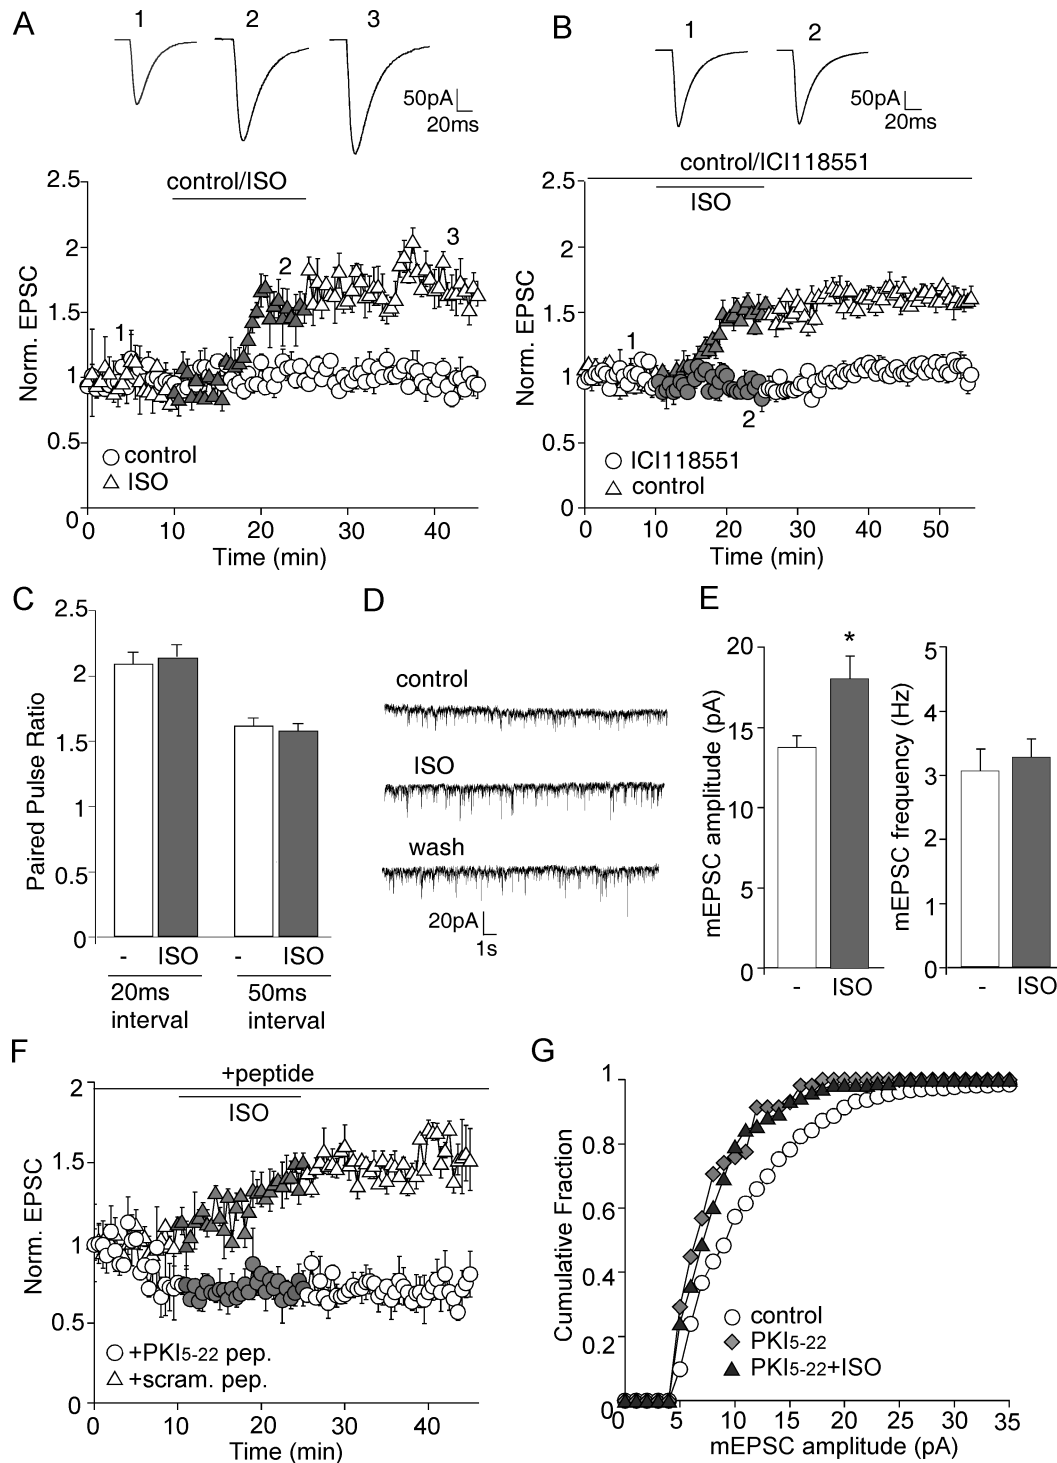

Supplemental Figure 7. ISO-induced increases in postsynaptic AMPAR-mediated EPSCs in PFC slices are mediated by PKA. EPSC (**A,B**) and mEPSC (**C-F**) were recorded from pyramidal cells in acute PFC slices with either the PKA-inhibitory PKI peptide or a scrambled control peptide present in the patch electrode. **A**. PKI but not control peptide prevented the increase in EPSC amplitude by 10 $\mu$ M ISO. **B**. PKI but not control peptide by itself induced a decrease in EPSC amplitude. **C**. Sample traces for mEPSC experiments. **D, F**. Neither PKI nor control peptide affected mEPSC frequency (**F**), which was further illustrated by a cumulative fraction plot of the lengths of intervals between events (**D**). **E**. PKI but not control peptide prevented the increase in EPSC amplitude by 10 $\mu$ M ISO (middle) and caused a decrease in basal mEPSC amplitude (right).
